# Supplementary material for: A Multigraph-Based Representation of Hi-C Data
Source: MDPI journal article supplement (doi:10.3390/genes13122189), 2022-11-23
Supplement: s1 [file s1]

**Supplementary Table S1: The result of the GO enrichment analysis. Genes and GO terms are shown by clusters as per Error! Reference source not found.. Columns with grey background shows GO terms of the most relevance as per Revigo.**

| Cluster | Genes                     | GO         | p-value     | Revigo     | GO name                                             |
|---------|---------------------------|------------|-------------|------------|-----------------------------------------------------|
| 1       | HORVU.MOREX.r2.2HG0084010 | GO:0016829 | 0.000326587 | GO:0007142 | male meiosis II                                     |
|         | HORVU.MOREX.r2.2HG0084040 | GO:0010333 | 0.022393533 | GO:0006777 | Mo-molybdopterin cofactor biosynthetic process      |
|         | HORVU.MOREX.r2.2HG0084050 | GO:0048544 | 0.042311555 | GO:0009767 | photosynthetic electron transport chain             |
|         | HORVU.MOREX.r2.7HG0528980 | GO:0007142 | 0.002447013 | GO:0048544 | recognition of pollen                               |
|         | HORVU.MOREX.r2.7HG0611230 | GO:0030170 | 0.03930111  |            |                                                     |
|         | HORVU.MOREX.r2.7HG0611240 | GO:0006777 | 0.002853725 | GO:0042651 | thylakoid membrane                                  |
|         | HORVU.MOREX.r2.7HG0611250 | GO:0030151 | 0.00203998  |            |                                                     |
|         | HORVU.MOREX.r2.7HG0611260 | GO:0102867 | 0.000408639 |            |                                                     |
|         | HORVU.MOREX.r2.7HG0611270 | GO:0008265 | 0.000408639 |            |                                                     |
|         |                           | GO:0009767 | 0.011320919 |            |                                                     |
|         |                           | GO:0042651 | 0.002853725 |            |                                                     |
|         |                           | GO:0045156 | 0.004882481 |            |                                                     |
| 6       | HORVU.MOREX.r2.3HG0251230 | GO:0003677 | 0.01783533  | GO:0006351 | transcription, DNA-templated                        |
|         | HORVU.MOREX.r2.4HG0323870 | GO:0006351 | 0.017564942 | -          |                                                     |
|         | HORVU.MOREX.r2.5HG0382510 | GO:0003899 | 0.009321586 | -          |                                                     |
|         | HORVU.MOREX.r2.5HG0438360 | GO:0005347 | 0.003936803 | -          |                                                     |
| 5       | HORVU.MOREX.r2.1HG0009390 | GO:0046983 | 0.010749531 | GO:0006397 | mRNA processing                                     |
|         | HORVU.MOREX.r2.1HG0009370 | GO:0008171 | 2.01E-07    | GO:0009630 | gravitropism                                        |
|         | HORVU.MOREX.r2.1HG0009380 | GO:0003735 | 0.049316596 | GO:2000012 | regulation of auxin polar transport                 |
|         | HORVU.MOREX.r2.2HG0119720 | GO:0006412 | 0.041744365 | GO:0009772 | photosynthetic electron transport in photosystem II |
|         | HORVU.MOREX.r2.2HG0119730 | GO:0019843 | 0.029905686 | GO:0006412 | translation                                         |
|         | HORVU.MOREX.r2.4HG0328900 | GO:0005524 | 0.013941887 | GO:0019684 | photosynthesis, light reaction                      |
|         | HORVU.MOREX.r2.4HG0348720 | GO:0009507 | 4.85E-10    |            |                                                     |
|         | HORVU.MOREX.r2.5HG0351700 | GO:0006397 | 1.22906E-05 | GO:0009539 | photosystem II reaction center                      |
|         | HORVU.MOREX.r2.5HG0351720 | GO:0045156 | 0.009899508 | GO:0009507 | chloroplast                                         |
|         | HORVU.MOREX.r2.5HG0351740 | GO:0019684 | 0.017197097 | GO:0015935 | small ribosomal subunit                             |
|         | HORVU.MOREX.r2.5HG0351750 | GO:0009772 | 0.007442868 | GO:0016592 | mediator complex                                    |
|         | HORVU.MOREX.r2.5HG0351810 | GO:0009523 | 0.046080582 |            |                                                     |
|         | HORVU.MOREX.r2.5HG0447040 | GO:0009539 | 0.006621295 |            |                                                     |
|         | HORVU.MOREX.r2.6HG0458780 | GO:0015935 | 0.035360437 |            |                                                     |
|         | HORVU.MOREX.r2.6HG0525460 | GO:0016592 | 0.039217903 |            |                                                     |
|         | HORVU.MOREX.r2.6HG0525530 | GO:0003712 | 0.040751891 |            |                                                     |
|         | HORVU.MOREX.r2.7HG0531040 | GO:0009630 | 0.003321493 |            |                                                     |
|         | HORVU.MOREX.r2.UnG0626200 | GO:2000012 | 0.000832413 |            |                                                     |
|         | HORVU.MOREX.r2.UnG0631430 |            |             |            |                                                     |
|         | HORVU.MOREX.r2.UnG0634820 |            |             |            |                                                     |
|         | HORVU.MOREX.r2.UnG0635060 |            |             |            |                                                     |
|         | HORVU.MOREX.r2.UnG0636130 |            |             |            |                                                     |
| 3       | HORVU.MOREX.r2.1HG0000220 | GO:0030246 | 1.31E-07    | GO:0006952 | defense response                                    |
|         | HORVU.MOREX.r2.1HG0000210 | GO:0006952 | 0.035307495 | GO:0016192 | vesicle-mediated transport                          |
|         | HORVU.MOREX.r2.2HG0088720 | GO:0048046 | 2.41E-08    | GO:0006886 | intracellular protein transport                     |
|         | HORVU.MOREX.r2.3HG0224110 | GO:0006886 | 0.040797895 |            |                                                     |
|         | HORVU.MOREX.r2.7HG0534690 | GO:0016192 | 0.026098537 | GO:0048046 | apoplast                                            |

|   |                           |            |             |            |                                                         |
|---|---------------------------|------------|-------------|------------|---------------------------------------------------------|
|   | HORVU.MOREX.r2.7HG0534710 | GO:0030117 | 0.005886245 | GO:0030117 | membrane coat                                           |
|   | HORVU.MOREX.r2.7HG0541120 |            |             |            |                                                         |
|   | HORVU.MOREX.r2.UnG0627550 |            |             |            |                                                         |
|   | HORVU.MOREX.r2.UnG0629750 |            |             |            |                                                         |
|   | HORVU.MOREX.r2.UnG0633140 |            |             |            |                                                         |
|   | HORVU.MOREX.r2.UnG0634230 |            |             |            |                                                         |
| 4 | -                         |            |             |            |                                                         |
| 2 | HORVU.MOREX.r2.2HG0081910 | GO:0016829 | 0.000160326 | GO:0000724 | double-strand break repair via homologous recombination |
|   | HORVU.MOREX.r2.2HG0082000 | GO:0010333 | 0.000118978 | GO:0009908 | flower development                                      |
|   | HORVU.MOREX.r2.3HG0255950 | GO:0000287 | 0.041151279 | GO:0030154 | cell differentiation                                    |
|   | HORVU.MOREX.r2.4HG0330120 | GO:0048544 | 0.030163501 | GO:0048544 | recognition of pollen                                   |
|   | HORVU.MOREX.r2.5HG0445110 | GO:0009908 | 0.002296102 |            |                                                         |
|   | HORVU.MOREX.r2.5HG0445120 | GO:0030154 | 0.007425815 | GO:0031519 | PcG protein complex                                     |
|   | HORVU.MOREX.r2.7HG0544320 | GO:0000724 | 0.005721514 |            |                                                         |
|   |                           | GO:0018024 | 0.010253908 |            |                                                         |
|   |                           | GO:0031519 | 0.000862212 |            |                                                         |
